# Supplementary material
Source: publisher site journal article supplement (https://static.cambridge.org/content/id/urn:cambridge.org:id:article:S1368980021002871/resource/name/S1368980021002871supp002.docx)
Supplement: Supplementary file 1 [file S1368980021002871supp002.docx]

The manuscript reports a simulation study, for which no specific checklist is available.
